# Supplementary material for: Potent Intestinal Mucosal Barrier Enhancement of Nostoc commune Vaucher Polysaccharide Supplementation Ameliorates Acute Ulcerative Colitis in Mice Mediated by Gut Microbiota
Source: MDPI journal article supplement (doi:10.3390/nu15133054), 2023-07-06
Supplement: s1 [file s1]

## Supplementary Figures

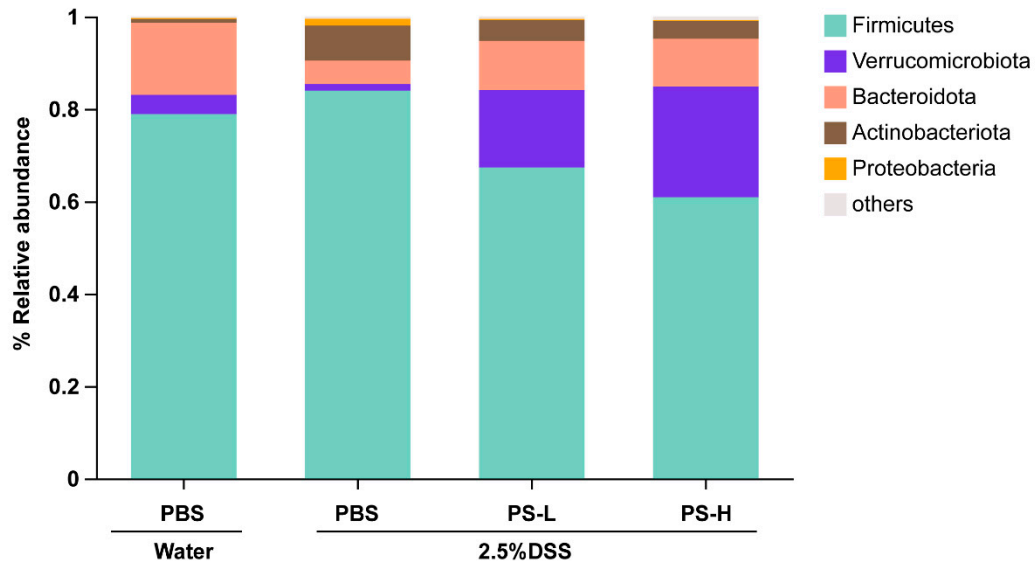

**Supplementary Figure S1.** Relative abundance of gut bacterial phylum in each group as described in Figure 2a.

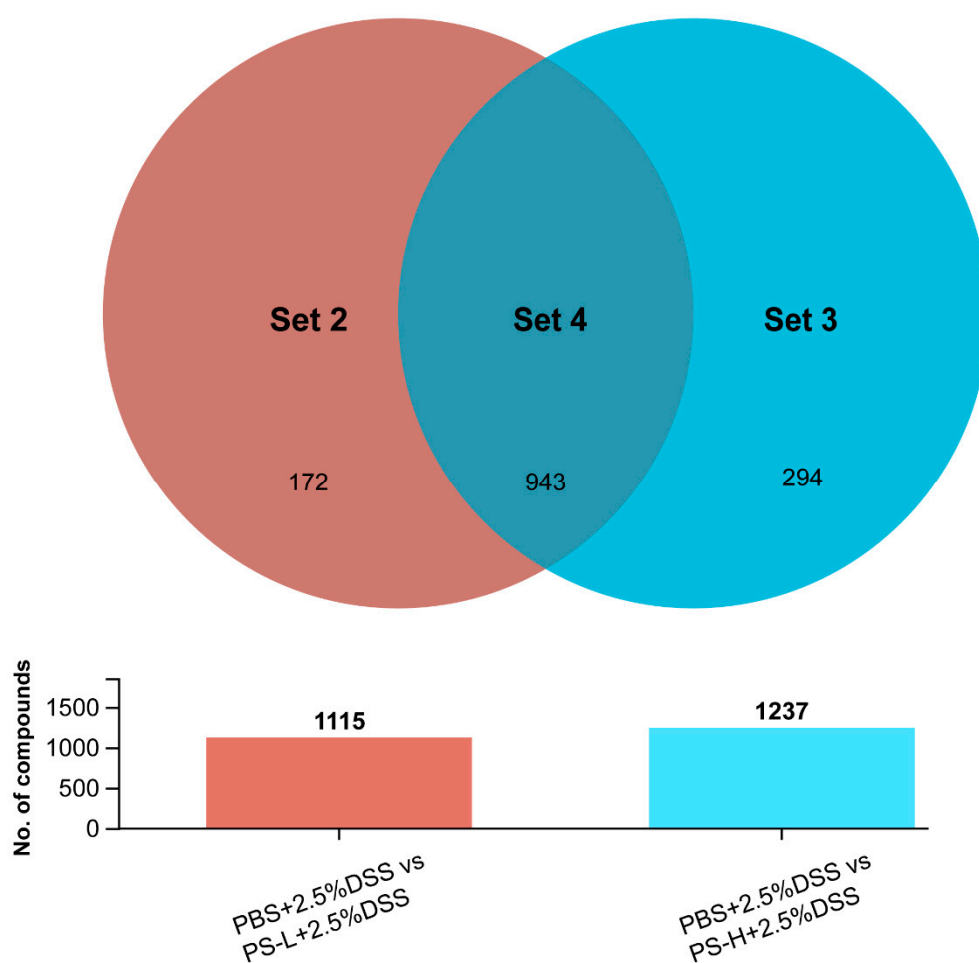

**Supplementary Figure S2.** The Venn diagram of termed metabolic sets (upper) and the number of differential metabolites between each PS treatment group and DSS-induced group (lower).
